# Supplementary material for: Graphene quantum dots functionalised with rhamnolipid produced from bioconversion of palm kernel oil by Pseudomonas stutzeri BK-AB12MT as a photocatalyst
Source: Royal Society of Chemistry journal article supplement (doi:10.1039/d2ra05967c), 2023-01-01
Supplement: d2ra05967c1.pdf [file d2ra05967c1.pdf]

## Electronic Supplementary Material

# Functionalization of Graphene Quantum Dots with Rhamnolipid Produced from Bioconversion of Palm Kernel Oil by *Pseudomonas stutzeri* BK-AB12MT

Samuel Ivan<sup>1</sup>, Fera Faridatul Habibah<sup>1</sup>, Atthar Luqman Ivansyah<sup>2</sup>, Rukman Hertadi<sup>1</sup> (✉)

<sup>1</sup> Biochemistry Research Division, Chemistry Department, Bandung Institute of Technology, Bandung 40132, Indonesia

<sup>2</sup> Analytical Chemistry Research Division, Chemistry Department, Bandung Institute of Technology, Bandung 40132, Indonesia

<sup>†</sup> Present address: Department, University, City and Postcode, Country

Supporting information to DOI 10.1007/s12274-\*\*\*\*-\*\*\*\*-\* (automatically inserted by the publisher)

**INFORMATION ABOUT ELECTRONIC SUPPLEMENTARY MATERIAL.** The font is Minion Pro 9.5. Electronic supplementary material (ESM) may include large artwork, lengthy descriptions, and extensive data. Each supporting information artwork, description, and data file should be referred to in the manuscript at least once. The format is “Fig. S1 in the Electronic Supplementary Material (ESM)”, or “Figure S2 in the ESM” at the beginning of a sentence. A brief description of the ESM should be included in the main text, before the references section, in a paragraph entitled “Electronic Supplementary Material:”. ESM should be submitted with the manuscript and will be sent to referees during peer review. Authors should ensure that it is clearly presented.

### Experimental Design and Data for RSM analysis

The experimental design is provided in **Table S-1**. The oil spreading diameter is used as response of optimization using RSM.

**Table S-1** Experimental design for rhamnolipid production using RSM

| Run | PKO Concentration (%(v/v)) | Urea Concentration (%(w/v)) | Incubation Time (hours) | Oil Spreading Diameter (cm) |
|-----|----------------------------|-----------------------------|-------------------------|-----------------------------|
| 1   | 15                         | 0.3                         | 16                      | 3.40 ± 0.53                 |
| 2   | 15                         | 0.1                         | 32                      | 2.07 ± 0.31                 |
| 3   | 15                         | 0.3                         | 32                      | 1.80 ± 0.17                 |
| 4   | 15                         | 0.1                         | 16                      | 2.50 ± 0.50                 |
| 5   | 5                          | 0.3                         | 16                      | 1.57 ± 0.71                 |
| 6   | 5                          | 0.1                         | 32                      | 2.33 ± 0.59                 |
| 7   | 5                          | 0.3                         | 32                      | 2.10 ± 0.46                 |
| 8   | 5                          | 0.1                         | 16                      | 1.30 ± 0.10                 |
| 9   | 10                         | 0.2                         | 24                      | 3.77 ± 0.49                 |
| 10  | 10                         | 0.2                         | 24                      | 3.57 ± 0.90                 |
| 11  | 10                         | 0.2                         | 24                      | 5.20 ± 0.98                 |
| 12  | 18.409                     | 0.2                         | 24                      | 1.10 ± 0.52                 |
| 13  | 1.591                      | 0.2                         | 24                      | 0.73 ± 0.06                 |
| 14  | 10                         | 0.368                       | 24                      | 1.17 ± 0.29                 |
| 15  | 10                         | 0.032                       | 24                      | 0.60 ± 0.17                 |
| 16  | 10                         | 0.2                         | 37.454                  | 1.33 ± 0.42                 |
| 17  | 10                         | 0.2                         | 10.546                  | 2.30 ± 0.56                 |
| 18  | 10                         | 0.2                         | 24                      | 5.20 ± 1.04                 |
| 19  | 10                         | 0.2                         | 24                      | 4.00 ± 0.40                 |
| 20  | 10                         | 0.2                         | 24                      | 3.67 ± 1.30                 |

### Analysis of Variance (ANOVA) for RSM Results

To evaluate the RSM results, we provide ANOVA (shown in Table S-2).

**Table S-2** Analysis of variance (ANOVA) results of the model

|                     | Degrees of Freedom | Sum Squares | Mean Square | F-value | p-value   |
|---------------------|--------------------|-------------|-------------|---------|-----------|
| Block               | 1                  | 1.0405      | 1.0405      | 1.9755  | 0.1934382 |
| First Order         | 3                  | 1.2176      | 0.4059      | 0.7706  | 0.5390474 |
| Two-Way Interaction | 3                  | 2.0031      | 0.6677      | 1.2677  | 0.3427406 |
| Pure Quadratic      | 3                  | 27.8100     | 9.2700      | 17.5991 | 0.0004168 |
| Residuals           | 9                  | 4.7406      | 0.5267      |         |           |
| Lack of Fit         | 5                  | 1.8634      | 0.3727      | 0.5181  | 0.7561554 |
| Pure Error          | 4                  | 2.8772      | 0.7193      |         |           |
